# Supplementary material for: miR-361-3p Regulates Liver Tumor-initiating Cells Expansion and Chemo-resistance
Source: PubMed Central journal article supplement (PMC7847642; doi:10.7150/jca.52395), 2021-01-01
Supplement: jcav12p1483s1.pdf [file jcav12p1483s1.pdf]

# **miR-361-3p Regulates Liver Tumor-initiating Cells Expansion and Chemo-resistance**

Shuping Qu<sup>1,#</sup>, Xiaobing Zhang<sup>1,#</sup>, Yue Wu<sup>1,#</sup>, HengYu Li<sup>2</sup>, Jian Zhai<sup>1,\*</sup>, Dong Wu<sup>1,\*</sup>

<sup>1</sup>Department of Hepatic Surgery, Third Affiliated Hospital of Second Military Medical University, Shanghai, 200438, China.

<sup>2</sup>Department of General surgery, First Affiliated Hospital of Second Military Medical University, Shanghai, 200433, China.

<sup>#</sup>These authors contributed equally to this work.

**Correspondence author address:** Department of Hepatic Surgery, Third Affiliated Hospital of Second Military Medical University, Shanghai, 200438, China, E-mail: [jianzhai1979@126.com](mailto:jianzhai1979@126.com) (Jian Zhai); [WuDongEHBH@126.com](mailto:WuDongEHBH@126.com) (Dong Wu).

**Running title:** miR-361-3p promotes liver T-ICs expansion.

## **Funding**

This work is supported by the National Natural Science Foundation of China (81672718).

## Supplementary Figure 1

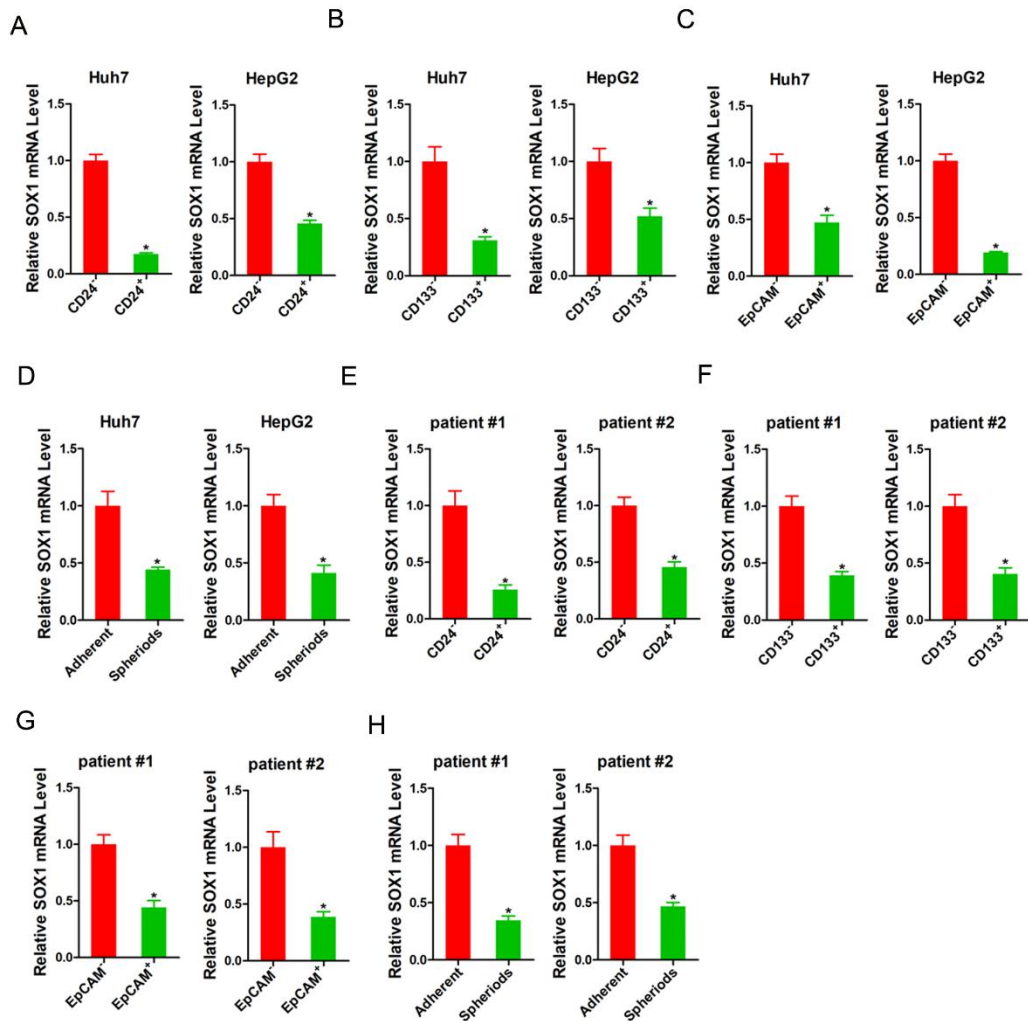

### Supplementary Figure 1:

A. The expression of SOX1 in CD24<sup>+</sup> and CD24<sup>-</sup> HCC cells was assessed by real-time PCR assay.

B. The expression of SOX1 in CD133<sup>+</sup> and CD133<sup>-</sup> HCC cells was detected by real-time PCR assay.

C. The expression of SOX1 in EpCAM<sup>+</sup> and EpCAM<sup>-</sup> HCC cells was checked by real-time PCR assay.

D. The expression of SOX1 in hepatoma spheroids was examined by real-time PCR assay.

E. The expression of SOX1 in CD24<sup>+</sup> and CD24<sup>-</sup> primary HCC cells was assessed by

real-time PCR assay.

F. The expression of SOX1 in CD133<sup>+</sup> and CD133<sup>-</sup> primary HCC cells was detected by real-time PCR assay.

G. The expression of SOX1 in EpCAM<sup>+</sup> and EpCAM<sup>-</sup> primary HCC cells was checked by real-time PCR assay.

H. The expression of SOX1 in primary hepatoma spheroids was examined by real-time PCR assay.

## Supplementary Tables

**Supplementary Table 1. Clinicopathological features of 70 HCC patients in Cohort 1**

| Characteristics            |          | Total n=70 |
|----------------------------|----------|------------|
| Age(year)                  | ≤50      | 44         |
|                            | >50      | 26         |
| Gender                     | Male     | 65         |
|                            | Female   | 5          |
| HBsAg                      | Positive | 57         |
|                            | Negative | 13         |
| AFP(μg/L)                  | ≤400     | 51         |
|                            | >400     | 19         |
| Tumor size(cm)             | ≤5       | 26         |
|                            | >5       | 44         |
| Tumor number               | Single   | 43         |
|                            | Multiple | 27         |
| Portal vein tumor thrombus | Yes      | 12         |
|                            | No       | 58         |
| Pathological satellite     | Yes      | 28         |
|                            | No       | 42         |
| BCLC stage                 | A        | 29         |
|                            | B or C   | 41         |
| TNM                        | I-II     | 30         |
|                            | I-II     | 40         |

HBsAg: hepatitis B virus surface antigen; AFP:  $\alpha$ -fetoprotein; TNM: Tumor-Nodes-Metastasis;

BCLC: Barcelona Clinic Liver Cancer Staging.

**Supplementary Table 2. Clinicopathologic Features of 68 HCC Specimens in Cohort 2**

| Characteristics            |          | Total n=68 |
|----------------------------|----------|------------|
| Age(year)                  | ≤50      | 40         |
|                            | >50      | 28         |
| Gender                     | Male     | 61         |
|                            | Female   | 7          |
| HBsAg                      | Positive | 57         |
|                            | Negative | 11         |
| AFP(μg/L)                  | ≤400     | 50         |
|                            | >400     | 18         |
| Tumor size(cm)             | ≤5       | 19         |
|                            | >5       | 49         |
| Tumor number               | Single   | 38         |
|                            | Multiple | 30         |
| Portal vein tumor thrombus | Yes      | 10         |
|                            | No       | 58         |
| Pathological satellite     | Yes      | 25         |
|                            | No       | 43         |
| BCLC stage                 | A        | 26         |
|                            | B or C   | 42         |
| TNM                        | I-II     | 29         |
|                            | I-II     | 39         |

HBsAg: hepatitis B virus surface antigen; AFP:  $\alpha$ -fetoprotein; TNM: Tumor-Nodes-Metastasis;

BCLC: Barcelona Clinic Liver Cancer Staging.

**Supplementary Table 3. Primer List.**

| <b>Gene</b>    | <b>Forward primer</b> | <b>Reverse primer (5'-3')</b> |
|----------------|-----------------------|-------------------------------|
| miR-361-3p     | Forward               | GCCGCTCCCCCAGGTGTGATT         |
|                | Reverse               | GTGCAGGGTCCGAGGT              |
| U6             | Forward               | CTCGCTTCGGCAGCACATA           |
|                | Reverse               | AACGATTCACGAATTTGCGT          |
| $\beta$ -actin | Forward               | GGCCCAGAATGCAGTTCGCCTT        |
|                | Reverse               | AATGGCACCCCTGCTCACGCA         |
| SOX2           | Forward               | TGGAGAAGGAATGGTCCACTTC        |
|                | Reverse               | GGATAAGTACACGCTGCCCG          |
| OCT4           | Forward               | ATGTGCGCGTAACTGTCCAT          |
|                | Reverse               | CTGCAGTGTGGGTTTCGGGCA         |
| SOX1           | Forward               | AATACTGGAGACGAACGCCG          |
|                | Reverse               | CCCTCGAGCAAAGAAAACGC          |
| c-Myc          | Forward               | CCCTCCACTCGGAAGGACTA          |
|                | Reverse               | GCTGGTGCATTTTCGGTTGT          |

**Supplementary Table 4. Antibody List.**

| <b>Antigens</b> | <b>Manufacturer</b>                    | <b>Application</b> |
|-----------------|----------------------------------------|--------------------|
| SOX1            | Proteintech Group, China               | 1:1000 for WB      |
| PARP            | Cell Signaling Technology, Beverly, MA | 1:1000 for WB      |
| $\beta$ -actin  | Santa Cruz Biotechnology, CA           | 1:5000 for WB      |
| GAPDH           | Santa Cruz Biotechnology, CA           | 1:5000 for WB      |
